# Supplementary material
Source: PubMed Central journal article supplement (PMC548570)

**A.**

Consensus T-box site:      **AATTTCA CAC CTAG GIGI GAAATT**

Consensus T-box mutant:    **AATTTCA CGI CTAG GTAC GAAATT**

Human IL-2 promoter:        **GAGCTAT CAC CTAA GTGT GGGCTA**

Murine IL-2 promoter:        **AAACTGC CAC CTAA GIGI GGGCTA**

Murine IL-2 promoter mutant: **AAACTGC CAC CTA GGTGT GGGCTA**

**B.**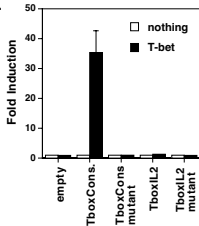**C.**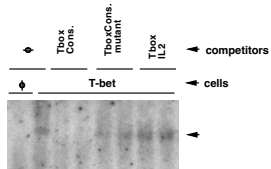

Supplement: pnas_102_6_2034__1.pdf [file pnas_102_6_2034__1.pdf]
